# Supplementary material
Source: PubMed Central journal article supplement (PMC2435407)

Supplemental Fig.1. LC-MS/MS of GluC digested IRS-1 residues 1021-1051 with and without GlcNAc. A. MS/MS of precursor at m/z 966.1 (3+) confirms the identity of the unmodified peptide 1021-1051. B. MS/MS of the precursor at m/z 1034.4 (3+) is consistent with the presence of O-GlcNAc modification. Generation of the neutral loss ion at m/z 966.1 triggered acquisition of MS<sub>3</sub> and aided in detection of this O-GlcNAc modified peptide. Fragment ions that retained the monosaccharide are indicated (†). The fragmentation pattern is consistent with the site of modification occurring between residues 1032-1042.

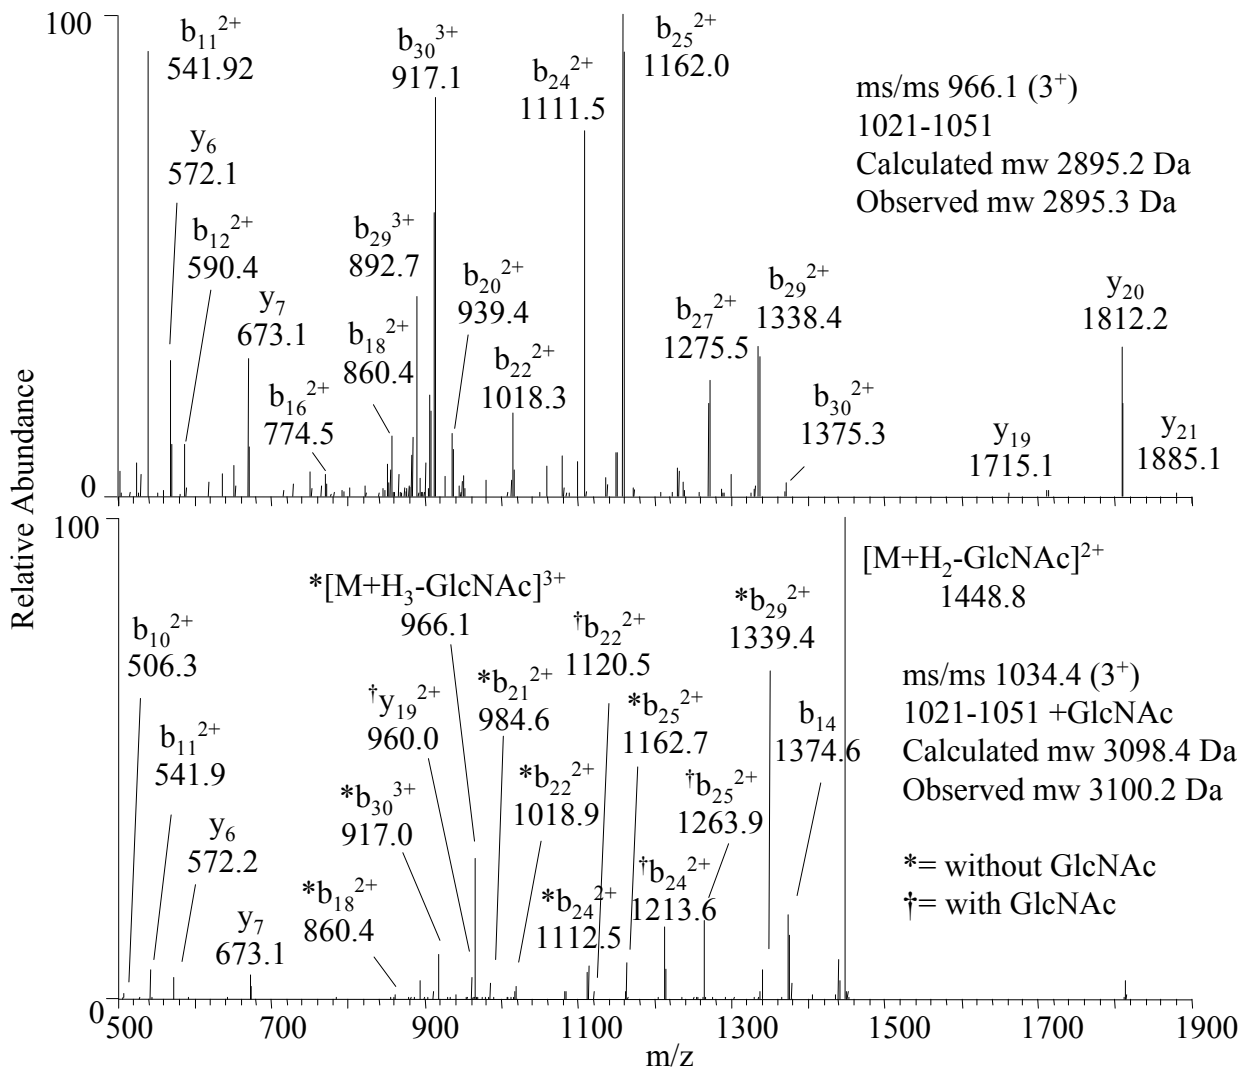

Supplement: NIHMS49146-supplement-BallSupfig_1.pdf [file NIHMS49146-supplement-BallSupfig_1.pdf]
